# Supplementary material for: An alkynylboronic ester cycloaddition route to functionalised aromatic boronic esters
Source: Royal Society of Chemistry journal article supplement (doi:10.1039/b607322k), 2006-01-01
Supplement: b607322k.pdf [file b607322k.pdf]

## Supplementary Material

### An alkynylboronic ester cycloaddition route to functionalised aromatic boronic esters

Patrick M. Delaney,<sup>a</sup> Jane E. Moore<sup>a</sup> and Joseph P. A. Harrity<sup>\*a</sup>

<sup>a</sup>Department of Chemistry, University of Sheffield, Brook Hill, Sheffield, S3 7HF

#### General Procedures

Infrared (IR) Spectra were recorded on a Perkin Elmer Paragon 100 FTIR spectrophotometer,  $\nu_{\max}$  in  $\text{cm}^{-1}$ . Samples were recorded as thin films using sodium chloride plates, as a DCM solution. Bands are characterised as broad (br), strong (s), medium (m), and weak (w).  $^1\text{H}$  NMR spectra were recorded on a Bruker AC-250 (250 MHz) or AMX-400 (400 MHz) supported by an Aspect 3000 data system, unless otherwise stated. Chemical shifts are reported in ppm from tetramethylsilane with the residual protic solvent resonance as the internal standard ( $\text{CHCl}_3$ :  $\delta 7.27\text{ppm}$ ). Data are reported as follows: chemical shift, integration, multiplicity (s=singlet, d=doublet, q=quartet, pent=pentet, sext=sextet, br=broad, m=multiplet, app=apparent), coupling constants (Hz), and assignment.  $^{13}\text{C}$  NMR spectra were recorded on a Bruker AC-250 (62.9 MHz) or AMX-400 (100.6 MHz) with complete proton decoupling. Chemical shifts are reported in ppm from tetramethylsilane with the solvent as the internal reference ( $\text{CDCl}_3$ :  $\delta 77.0\text{ppm}$ ). Low resolution mass spectra were recorded on Micromass Autospec, operating in E.I., C.I. or FAB mode; or a Perkin-Elmer Turbomass Benchtop GC-MS operating in either E.I. or C.I. mode. High-resolution mass spectra (HRMS) recorded for accurate mass analysis, were performed on either a MicroMass LCT operating in Electrospray mode ( $\text{TOF ES}^+$ ) or a MicroMass Prospec operating in FAB ( $\text{FAB}^+$ ), EI ( $\text{EI}^+$ ) or CI ( $\text{CI}^+$ ) mode. Elemental microanalysis was performed using a Perkin-Elmer 2400 CHNS / O Series II Elemental Analyser. Melting points performed on recrystallised solids, were recorded on a Gallenkamp melting point apparatus and are uncorrected. All solvents and reagents were purified using standard laboratory techniques according to methods published in "Purification of Laboratory Chemicals" by Perrin, Armarego, and Perrin (Pergamon Press, 1966). Starting alkynylboronates<sup>1</sup> and pyranones<sup>2</sup> were prepared according to established procedures. Methyl coumalate was purchased from Aldrich chemical co. and used as received. Flash chromatography was performed on silica gel (BDH Silica Gel 60 43-60). Thin layer chromatography (TLC) was performed on aluminium backed plates pre-coated with

<sup>1</sup> H. C. Brown, N. G. Bhat, M. Srebink, *Tetrahedron Lett*, 1982, **29**, 2631.

<sup>2</sup> A. Haneda, H. Uenakai, T. Imawaga, M. Kawanisi, *Synth. Comm*, 1976, **6**, 141; I.W. Ashworth, M.C. Bowden, B. Dembofsky, D. Levin, W. Moss, E. Robinson, N. Szczur, J. Virica, *Org. Proc. Res. Dev.*, 2003, **7**, 74; C.G. Cho, Y.W. Kim, Y.K. Lim, J.S. Park, H. Lee, S. Koo, *J. Org. Chem*, 2002, **67**, 290.

silica (0.2 mm, Merck DC-alufolien Kieselgel 60 F<sub>254</sub>) which were developed using standard visualizing agents: Ultraviolet light or potassium permanganate. X-Ray data for compounds **13** and **15** have been deposited with the CCDC, supplementary entry numbers: 608269 and 608270 respectively.

## 1.1. [4+2] Cycloaddition

### Cycloaddition of **1** with **2a**

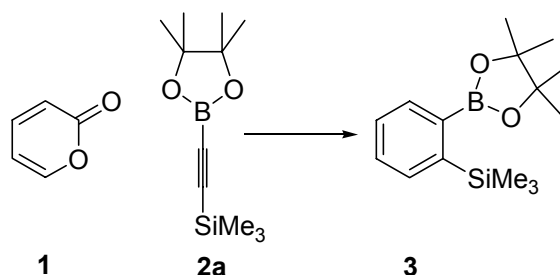

A mixture of **1** (0.1 g, 1.04 mmol) and **2a** (0.466 g, 2.08 mmol) was heated at 170 °C and stirred for 15 h under N<sub>2</sub>. The product was purified by flash column chromatography (eluting solvent petroleum ether/ethyl acetate 25:1 ratio) to give compound **3** as crystalline colourless solid, wt. 0.247 g, 86% yield.

**Mp** 84-86 °C **<sup>1</sup>H NMR** (250 MHz, CDCl<sub>3</sub>): δ 0.33 (9H, s, SiMe<sub>3</sub>), 1.34 (12H, s, 4 x CH<sub>3</sub>), 7.36 (2H, m, Ar-H) 7.61 (1H, m, Ar-H), 7.90 (1H, m, Ar-H); **<sup>13</sup>C NMR** (62.9 MHz, CDCl<sub>3</sub>) δ 1.1, 25.0, 83.8, 127.8, 129.7, 134.3, 136.1, 146.0; **FTIR**: ν<sub>max</sub>/CHCl<sub>3</sub>, 2981 (s) cm<sup>-1</sup>; **HRMS** (EI<sup>+</sup>) calcd for. C<sub>15</sub>H<sub>25</sub>BO<sub>2</sub>Si: 276.1717. Found: 276.1715.

### Cycloaddition of **4** with **2a**

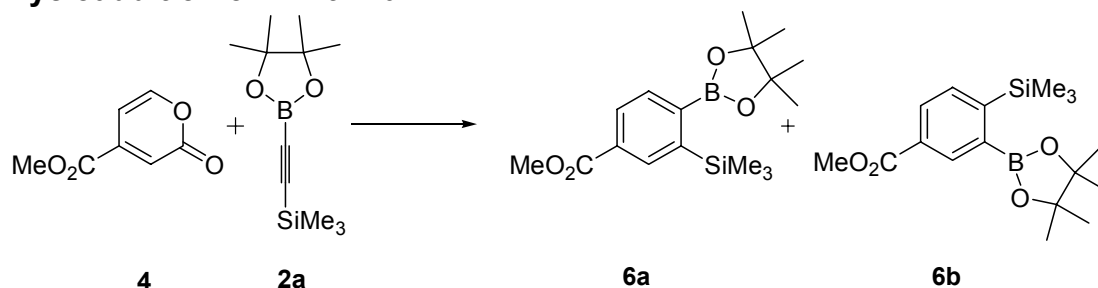

A mixture of **4** (0.1 g, 0.649 mmol) and **2a** (0.291 g, 1.298 mmol) was heated at 170 °C and stirred for 15 h under N<sub>2</sub>. The product was purified by flash column chromatography (eluting solvent petroleum ether/ethyl acetate 25:1 ratio) to give **6a** and **6b** (3:1 ratio) as colourless

oils, wt. 0.152 g, 70% yield. *The regiochemistry was determined by 2-D NMR experiment (nOesy) of the major regioisomer 6a.*

**6a** :  $^1\text{H}$  NMR (250 MHz,  $\text{CDCl}_3$ ):  $\delta$ 0.29 (9H, s,  $\text{SiMe}_3$ ), 1.29 (12H, s,  $\text{CH}_3$ ), 3.86 (3H, s,  $\text{CO}_2\text{CH}_3$ ), 7.62 (1H, d,  $J=8.0$  Hz, Ar-H), 7.93 (1H, dd,  $J=8.0, 1.5$  Hz, Ar-H), 8.43 (1H, d,  $J=1.5$  Hz, Ar-H);  $^{13}\text{C}$  NMR (62.9 MHz,  $\text{CDCl}_3$ )  $\delta$ 0.8, 25.0, 52.0, 84.1, 129.7, 130.2, 134.4, 136.4, 153.3, 167.4; FTIR:  $\nu_{\text{max}}/\text{CHCl}_3$ , 2979 (m), 2951 (w), 2901 (w), 1726 (s), 1593 (w), 1551 (w)  $\text{cm}^{-1}$ ; HRMS ( $\text{EI}^+$ ) calcd. for  $\text{C}_{17}\text{H}_{27}\text{O}_4\text{BSi}$  335.1850 Found: 335.1857

**6b** :  $^1\text{H}$  NMR (250 MHz,  $\text{CDCl}_3$ )  $\delta$ 0.36 (9H, s,  $\text{SiMe}_3$ ), 1.35 (12H, s,  $\text{CH}_3$ ), 3.91 (3H, s,  $\text{CO}_2\text{CH}_3$ ), 7.96 (2H, m, Ar-H), 8.24 (1H, d,  $J=1.5$  Hz, Ar-H);  $^{13}\text{C}$  NMR (62.9 MHz,  $\text{CDCl}_3$ )  $\delta$ 0.4, 25.0, 52.1, 84.2, 128.5, 130.5, 134.8, 135.9, 147.3, 167.5; FTIR  $\nu_{\text{max}}/\text{CHCl}_3$  2979 (m), 2952 (w), 1726 (s), 1595 (w), 1548 (w)  $\text{cm}^{-1}$ ; HRMS ( $\text{EI}^+$ ) calcd. for  $\text{C}_{17}\text{H}_{27}\text{O}_4\text{BSi}$  335.1850 Found: 335.1839

### Cycloaddition of 5 with 2a

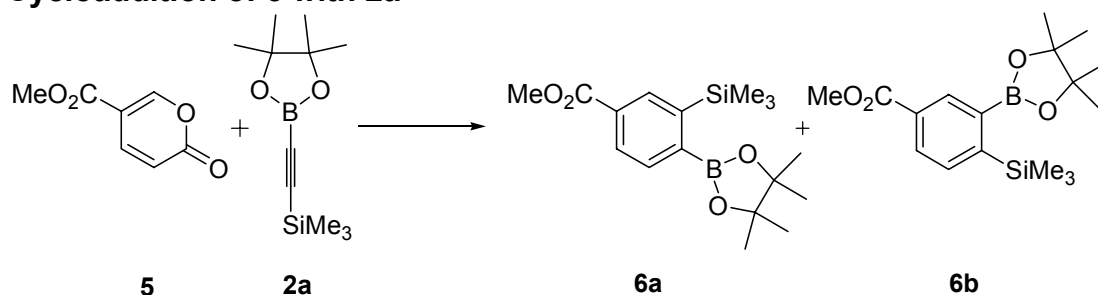

A mixture of **5** (0.2 g, 1.298 mmol) and **2a** (0.582 g, 2.595 mmol) was heated at 170 °C and stirred for 15 h under  $\text{N}_2$ . The product was purified by flash column chromatography (eluting solvent petroleum ether/ethyl acetate 25:1 ratio) to give the separated title compounds **6a** and **6b** (1:1 ratio) as colourless oils, wt. 0.384 g, 83% yield.

### Cycloaddition of 4 with 2b

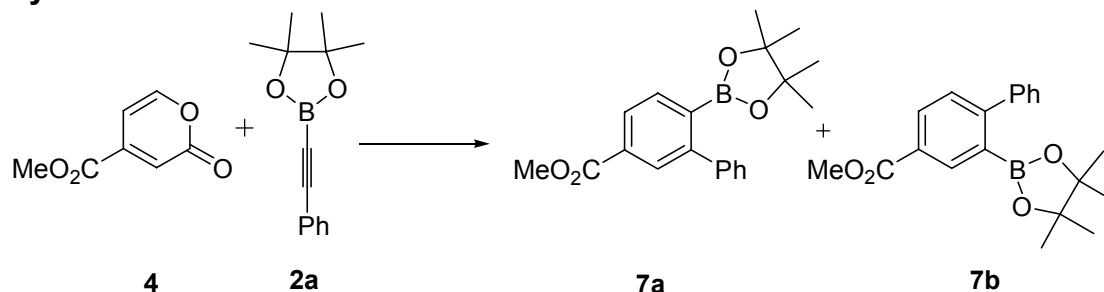

A mixture of **4** (0.1 g, 0.649 mmol) and **2a** (0.296 g, 1.298 mmol) was heated at 170 °C and stirred for 15 h under  $\text{N}_2$ . The product was purified by flash column chromatography (eluting

solvent petroleum ether/ethyl acetate 25:1 ratio) to give **7a** and **7b** (1:1 ratio) as a clear oil, 0.092g, 42%.

**7a** <sup>1</sup>H NMR: δ1.23 (12H, s, 4 x CH<sub>3</sub>), 3.95 (3H, s, CO<sub>2</sub>CH<sub>3</sub>), 7.35-7.48 (6H, m, Ar-H), 8.12 (1H, dd, J=8.0, 2.0 Hz, Ar-H) 8.38 (1H, dd, J=2.0, 0.5 Hz, Ar-H); <sup>13</sup>C NMR (62.9 MHz, CDCl<sub>3</sub>) δ24.6, 52.1, 84.0, 127.0, 127.5, 127.9, 128.9, 129.0, 130.0, 135.6, 142.1, 151.9, 167.0.

**7b** <sup>1</sup>H NMR: δ1.21 (12H, s, 4 x CH<sub>3</sub>), 3.92 (3H, s, CO<sub>2</sub>CH<sub>3</sub>), 7.35-7.48 (5H, m, Ar-H), 7.56 (1H, d, J=8.0 Hz, Ar-H), 7.98 (1H, dd, J=8.0, 1.5 Hz, Ar-H), 8.04 (1H, dd, J= 1.0, 0.5 Hz, Ar-H); <sup>13</sup>C NMR (62.9 MHz, CDCl<sub>3</sub>) δ24.7, 52.2, 84.1, 127.0, 127.2, 127.5, 128.0, 129.0, 129.1, 135.7, 142.0, 147.9, 167.0.

**FTIR:** ν<sub>max</sub>/CHCl<sub>3</sub>, 2991 (w), 2979 (w), 2940 (w), 1723 (s), 1600 (w) cm<sup>-1</sup>; **HRMS** (EI<sup>+</sup>) calcd. for C<sub>20</sub>H<sub>23</sub>O<sub>4</sub>B: 338.1689 Found: 338.1687.

### Cycloaddition of **5** with **2b**

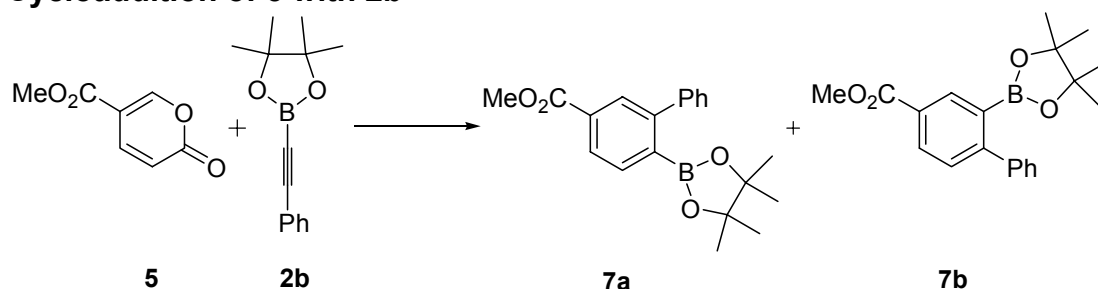

A mixture of **5** (0.1 g, 0.649 mmol) and **2b** (0.296 g, 1.298 mmol) was heated at 170 °C and stirred for 15 h under N<sub>2</sub>. The product was purified by flash column chromatography (eluting solvent petroleum ether/ethyl acetate 25:1 ratio) to give compounds **7a** and **7b** (1:14 ratio) as a clear oil, 0.127g, 57% yield. *The regiochemistry was determined by 2-D NMR experiment (nOesy) of the major regioisomer 7b.*

### Cycloaddition of **4** with **2c**

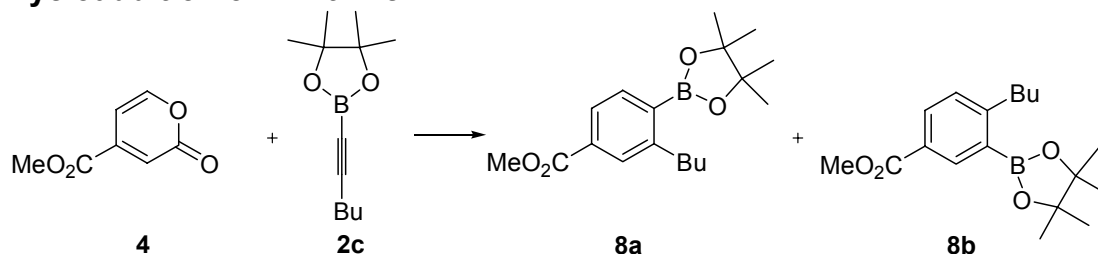

A mixture of **4** (0.1 g, 0.649 mmol) and **2c** (0.270 g, 1.298 mmol) was heated at 170 °C and stirred for 15 h under N<sub>2</sub>. The product was purified by flash column chromatography (eluting solvent petroleum ether/ethyl acetate 25:1 ratio) to give compounds **8a** and **8b** (10:1 ratio) as

a clear oil, wt. 0.050 g, 24% yield. *The regiochemistry was determined by 2-D NMR experiment (nOesy) of the major regioisomer 8a.*

**8a**  $^1\text{H}$  NMR:  $\delta$ 0.85 (3H, t,  $J=7.5$  Hz,  $\text{CH}_2\text{CH}_3$ ), 1.28 (12H, s, 4 x  $\text{CH}_3$ ), 1.22-1.37 (2H, m,  $\text{CH}_2\text{CH}_3$ ), 1.38-1.56 (2H, m,  $\text{CH}_2\text{CH}_2\text{CH}_3$ ), 2.85 (2H, app t,  $J=8.0$  Hz,  $\text{C}=\text{CCH}_2$ ), 3.88 (3H, s,  $\text{CO}_2\text{CH}_3$ ), 7.16 (1H, d,  $J=8.0$  Hz, Ar- $H$ ), 7.92 (1H, dd,  $J=8.0, 2.0$  Hz, Ar- $H$ ), 8.34 (1H, d,  $J=2.0$  Hz, Ar- $H$ );  $^{13}\text{C}$  NMR (62.9 MHz,  $\text{CDCl}_3$ )  $\delta$ 13.9, 22.7, 24.8, 35.3, 35.6, 51.9, 83.7, 126.8, 129.3, 131.8, 137.2, 155.5, 167.3.

**8b**  $^1\text{H}$  NMR:  $\delta$ 0.85 (3H, t,  $J=7.5$  Hz,  $\text{CH}_2\text{CH}_3$ ), 1.28 (12H, s, 4 x  $\text{CH}_3$ ), 1.22-1.37 (2H, m,  $\text{CH}_2\text{CH}_3$ ), 1.38-1.56 (2H, m,  $\text{CH}_2\text{CH}_2\text{CH}_3$ ), 2.85 (2H, app t,  $J=8.0$  Hz,  $\text{C}=\text{CCH}_2$ ), 3.89 (3H, s,  $\text{CO}_2\text{CH}_3$ ), 7.79 (2H, s, Ar- $H$ ), 7.81 (1H, s, Ar- $H$ );  $^{13}\text{C}$  NMR (62.9 MHz,  $\text{CDCl}_3$ )  $\delta$ 13.9, 22.7, 24.8, 35.2, 35.4, 52.0, 83.8, 125.6, 129.9, 131.8, 135.8, 150.2, 167.3.

**FTIR:**  $\nu_{\text{max}}/\text{CHCl}_3$ , 2977 (m), 2956 (m), 2931 (m), 2870 (m), 1723 (s)  $\text{cm}^{-1}$  **HRMS** ( $\text{EI}^+$ ) calcd. for  $\text{C}_{18}\text{H}_{27}\text{O}_4\text{B}$ : 318.2002 Found: 318.2012

### Cycloaddition of **5** with **2c**

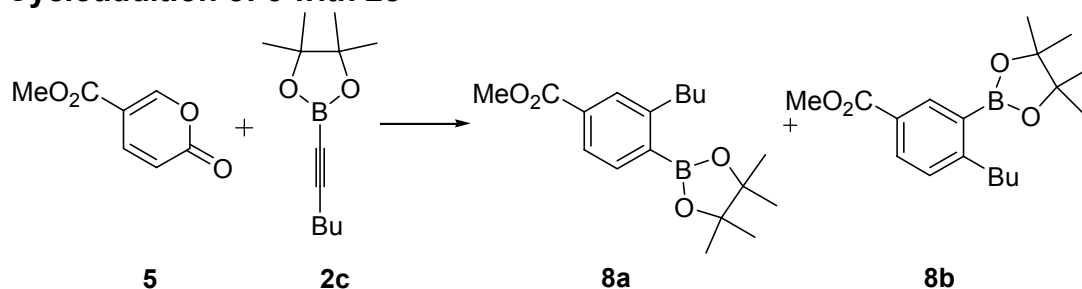

A mixture of **5** (0.1 g, 0.649 mmol) and **2c** (0.270 g, 1.298 mmol) was heated at 170 °C and stirred for 15 h under  $\text{N}_2$ . The product was purified by flash column chromatography (eluting solvent petroleum ether/ethyl acetate 25:1 ratio) to give compounds **8a** and **8b** (1: 3 ratio) as a clear oil, wt. 0.127 g, 59% yield. *The regiochemistry was determined by 2-D NMR experiment (nOesy) of the major regioisomer 8b.*

### Cycloaddition of **5** with **2d**

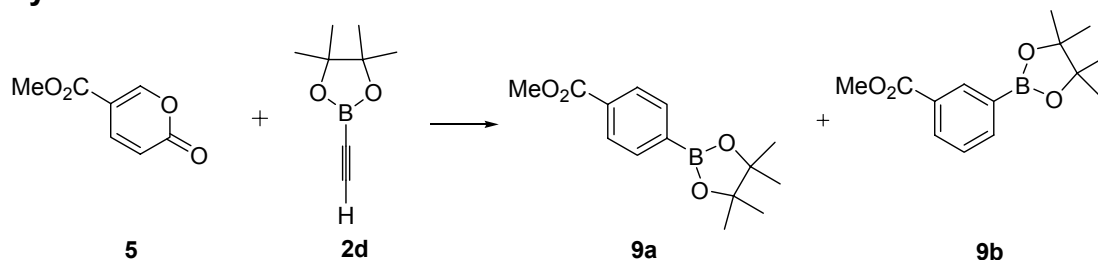

A mixture of **5** (0.1 g, 0.649 mmol), **2d** (0.09 g, 0.649 mmol) and diphenylether (1 mL) were heated at 170 °C with stirring, for 15 hours under a nitrogen atmosphere. The product was purified by flash column chromatography (eluting solvent 100: 1 petroleum ether: EtOAc) to give colourless crystalline solid of regioisomers in 5: 1 ratio (Major regioisomer was **9a**) wt. 0.130 g, 77% yield.

**9a**<sup>3</sup>: <sup>1</sup>H NMR (250 MHz, CDCl<sub>3</sub>): δ1.28 (12H, s, CH<sub>3</sub>), 3.84 (3H, s, CH<sub>3</sub>OCO), 7.79 (2H, d, *J*=8.5 Hz, ArH), 7.96 (2H, d, *J*=8.5 Hz, ArH). <sup>13</sup>C NMR (62.9 MHz, CDCl<sub>3</sub>): δ24.8, 52.1, 84.1, 127.8, 135.8, 134.6, 167.1

**9b**: <sup>1</sup>H NMR δ1.28 (12H, s, CH<sub>3</sub>), 3.84 (3H, s, CH<sub>3</sub>OCO), 7.38 (1H, t, *J*=8.0 Hz, ArH), 7.90 (1H, m, ArH), 8.05 (1H, dt, *J*=8.0, 1.0 Hz, ArH), 8.39 (1H, br, ArH). <sup>13</sup>C NMR (62.9 MHz, CDCl<sub>3</sub>): δ24.8, 52.0, 84.1, 128.6 (x 2), 132.3 (x 2), 139.1, 167.1.

**FTIR**: ν<sub>max</sub>/CHCl<sub>3</sub>, cm<sup>-1</sup> 2979 (w), 1727 (s), 1606 (w), 1510 (w), 1399 (m), 1361 (s). **HRMS** (EI<sup>+</sup>) Calcd for C<sub>29</sub>H<sub>24</sub>O<sub>4</sub> 262.1376 Found: 262.1377.

### Cycloaddition of **10** with **2a**

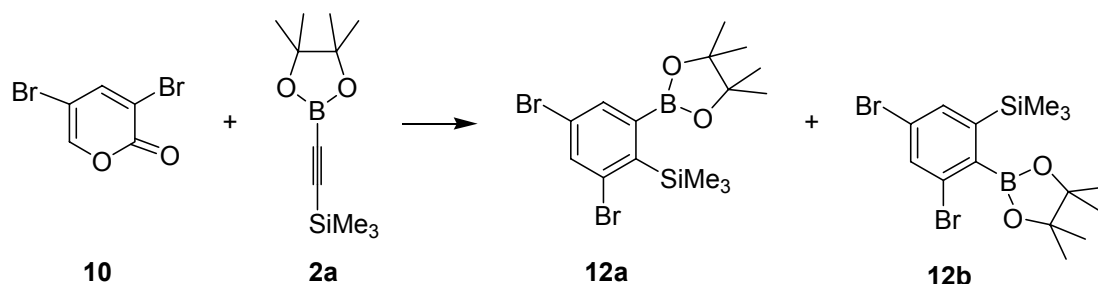

A mixture of **10** (0.100 g, 0.394 mmol) and **2a** (0.176 g, 0.788 mmol) and mesitylene (1 mL) was heated at 155 °C and stirred for 15 h under N<sub>2</sub>. The product was purified by flash column chromatography (eluting solvent petroleum ether/ethyl acetate 25:1 ratio) to give compounds **12a** and **12b** (1:1 ratio) as a brown oil, wt. 0.111 g, 65% yield.

**12a/b** mixture: <sup>1</sup>H NMR δ0.29 (9H, s, CH<sub>3</sub>), 0.37 (9H, s, CH<sub>3</sub>), 1.29 (12H, s, CH<sub>3</sub>), 1.37 (12H, s, CH<sub>3</sub>), 7.47 (1H, d, *J*=2.0 Hz, ArH), 7.51 (1H, d, *J*=2.0 Hz, ArH), 7.59 (1H, d, *J*=2.0 Hz, ArH), 7.64 (1H, d, *J*=2.0 Hz, ArH). <sup>13</sup>C NMR (62.9 MHz, CDCl<sub>3</sub>): δ-0.5, 1.8, 24.7, 25.3, 84.5, 85.5, 112.5(x2), 134.3(x2), 134.8(x2), 135.0(x2), 136.3(x2).

**FTIR**: ν<sub>max</sub>/CHCl<sub>3</sub>, cm<sup>-1</sup> 2980 (s), 1315 (s), 846 (s). **HRMS** (EI<sup>+</sup>) Calcd for C<sub>15</sub>H<sub>23</sub>BBBr<sub>2</sub>O<sub>2</sub>Si 431.9927 Found: 431.9909.

<sup>3</sup> N. Miyaura, M. Murata, I. Tatsuo, *J. Org. Chem.*, 1995, **60**, 7508.

### Cycloaddition of **10** with **2b**

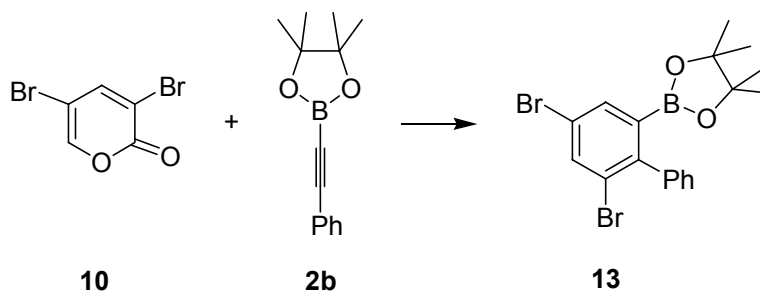

A mixture of **10** (0.200 g, 0.788 mmol) and **2b** (0.269 g, 1.182 mmol) and mesitylene (1 mL) was heated at 155 °C and stirred for 15 h under N<sub>2</sub>. The product was purified by flash column chromatography (eluting solvent petroleum ether/ethyl acetate 25:1 ratio) to give compound **13** as brown solid, 0.214g, 62% yield. *The regiochemistry was determined by X-ray crystallography.*

**Mp** 54-56 °C. **<sup>1</sup>H NMR** δ1.06 (12H, s, CH<sub>3</sub>), 7.28 (2H, m, ArH), 7.36 (3H, m, ArH), 7.72 (1H, d, *J*=2.0 Hz, ArH), 7.85 (1H, d, *J*=2.0 Hz, ArH). **<sup>13</sup>C NMR** (62.9 MHz, CDCl<sub>3</sub>): δ24.4, 84.2, 113.3, 114.0, 115.0, 117.5, 122.0, 127.6, 129.5, 135.4, 136.3. **FTIR**: ν<sub>max</sub>/CHCl<sub>3</sub>, cm<sup>-1</sup> 2979 (w), 2979(s), 1458 (w), 1145 (w). **HRMS** (EI<sup>+</sup>) Calcd for C<sub>18</sub>H<sub>19</sub>BBr<sub>2</sub>O<sub>2</sub> 381.0490 Found: 381.0486.

### Cycloaddition of **10** with **2c**

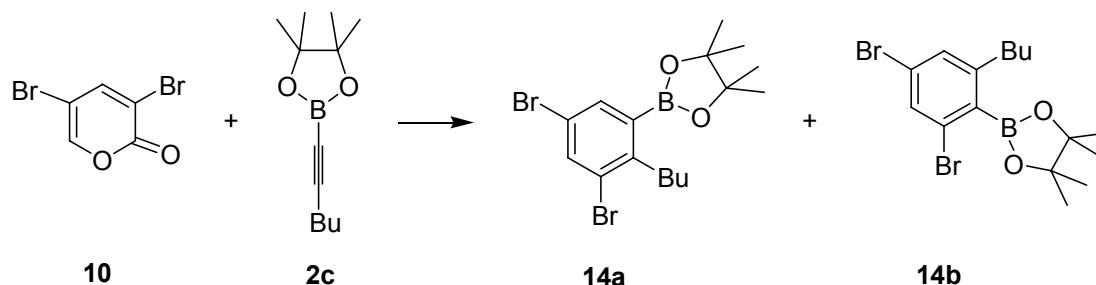

A mixture of **10** (0.100 g, 0.394 mmol) and **2c** (0.123 g, 0.591 mmol) and mesitylene (1 mL) was heated at 155 °C and stirred for 15 h under N<sub>2</sub>. The product was purified by flash column chromatography (eluting solvent petroleum ether/ethyl acetate 25:1 ratio) to give compounds **14a** and **14b** as a brown oil, wt. 0.077 g, 47% yield. *The regiochemistry was determined by NMR experiment (nOe) of the major regioisomer 14a.*

**14a**: **<sup>1</sup>H NMR** δ0.87 (3H, t, CH<sub>2</sub>CH<sub>3</sub>), 1.26 (12H, s, CH<sub>3</sub>), 1.27-1.36 (4H, m, CH<sub>2</sub>CH<sub>2</sub>CH<sub>3</sub>), 2.92 (2H, t, *J*=8.0 Hz, C=CCH<sub>2</sub>), 7.66 (1H, d, *J*=1.0 Hz, ArH), 7.73 (1H, d, *J*=1.0 Hz, ArH). **<sup>13</sup>C NMR** (62.9 MHz, CDCl<sub>3</sub>): δ13.9, 22.9, 24.8, 34.4, 35.4, 81.5, 125.6, 130.4, 134.9, 137.3, 137.7.

**FTIR:**  $\nu_{\max}$ /CHCl<sub>3</sub>, cm<sup>-1</sup> 2958 (s). **HRMS** (EI<sup>+</sup>) Calcd for C<sub>16</sub>H<sub>23</sub>BBr<sub>2</sub>O<sub>2</sub> 416.0158 Found: 416.0162.

### Cycloaddition of **11** with **2b**

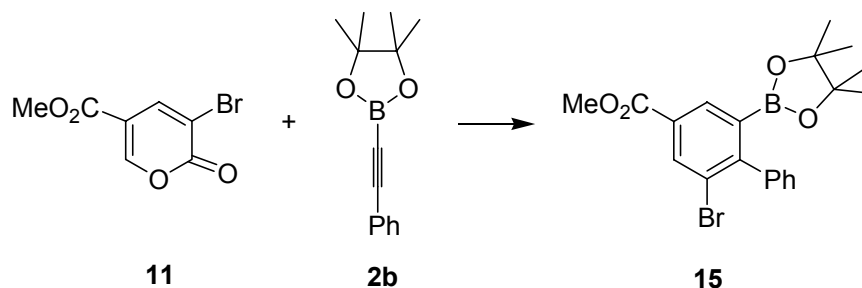

A mixture of **11** (0.1 g, 0.429 mmol) and **2b** (0.391 g, 1.716 mmol) was heated at 170 °C and stirred for 15 h under vacuum 10 mmHg. The product was purified by flash column chromatography (eluting solvent petroleum ether/ethyl acetate 25:1 ratio) to give compound **89** as brown solid, 0.099 g, 56% yield. *The regiochemistry was determined by X-ray crystallography.*

**Mp** 109-111 °C. <sup>1</sup>H NMR  $\delta$ 1.01 (12H, s, CH<sub>3</sub>), 3.85 (3H, s, CH<sub>3</sub>OCO), 7.30 (2H, m, ArH), 7.71 (3H, m, ArH), 8.17 (1H, d, *J* = 2.0 Hz, ArH), 8.28 (1H, d, *J* = 2.0 Hz, ArH). <sup>13</sup>C NMR (62.9 MHz, CDCl<sub>3</sub>):  $\delta$ 24.9, 52.6, 82.1, 122.9, 128.5, 128.8, 129.5, 130.9, 131.6, 134.7, 140.6, 147.4, 166.1. **FTIR:**  $\nu_{\max}$ /CHCl<sub>3</sub>, cm<sup>-1</sup> 2978 (w), 1727 (s). **HRMS** (EI<sup>+</sup>) Calcd for C<sub>20</sub>H<sub>22</sub>BBrO<sub>4</sub> 417.0873 Found: 417.0886.

### Suzuki reaction of **13** with *p*-iodotoluene

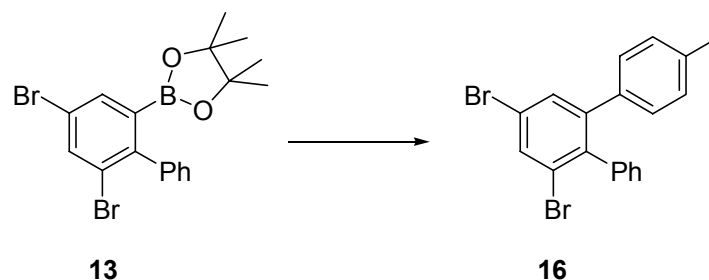

A round bottom flask was charged with **13** (0.260 g, 0.594 mmol), PdCl<sub>2</sub>(dppf)DCM (0.043 g, 0.059 mmol), K<sub>3</sub>PO<sub>4</sub> (0.378 g, 1.780 mmol), dioxane (1 ml) and iodotoluene (0.259 g, 1.187 mmol). The flask was fitted with a reflux condenser and heated at 85 °C under N<sub>2</sub>. After stirring for 48 h the reaction was cooled to room temperature and quenched by the addition of distilled water (10 ml), the product was extracted into dichloromethane (3 x 10 ml), dried (MgSO<sub>4</sub>), filtered and conc. *in vacuo*. The product was purified by flash column

chromatography (eluting solvent petroleum ether/ethyl acetate 15:1 ratio) to give compound **16** as clear oil, wt. 0.133 g, 56% yield.

**<sup>1</sup>H NMR** δ2.24 (3H, s, CH<sub>3</sub>), 6.86-6.95 (4H, m, ArH), 7.24-7.20 (2H, m, ArH), 7.49-7.50 (3H, m, ArH), 7.49 (1H, d, *J*=2.0 Hz, ArH), 7.81 (1H, d, *J*=2.0, Hz, ArH). **<sup>13</sup>C NMR** (62.9 MHz, CDCl<sub>3</sub>): δ21.3, 113.1, 113.9, 114.2, 115.1, 126.5, 127.3, 127.7, 128.5, 129.3, 130.1, 130.4, 133.8, 134.3, 135.0. **FTIR**: ν<sub>max</sub>/CHCl<sub>3</sub>, cm<sup>-1</sup> 2923 (w). **HRMS** (EI<sup>+</sup>) Calcd for C<sub>19</sub>H<sub>14</sub>Br<sub>2</sub> 399.9462 Found: 399.9462.

### Suzuki reaction of **13** with *p*-iodotoluene

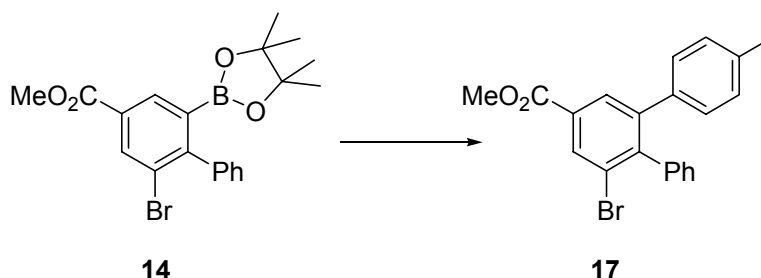

A round bottom flask was charged with **14** (0.088 g, 0.211 mmol), PdCl<sub>2</sub>(dppf)DCM (0.015 g, 0.021 mmol), K<sub>3</sub>PO<sub>4</sub> (.134 g, 0.633 mmol), dioxane (1 ml) and iodotoluene (0.092 g, 0.422 mmol). The flask was fitted with a reflux condenser and heated at 85 °C under N<sub>2</sub>. After stirring for 48 h the reaction was cooled to room temperature and quenched by the addition of distilled water (10 ml), the product was extracted into dichloromethane (3 x 10 ml), dried (MgSO<sub>4</sub>), filtered and conc. *in vacuo*. The product was purified by flash column chromatography (eluting solvent petroleum ether/ethyl acetate 15:1 ratio) to give compound **17** as colourless oil, wt. 0.076 g, 70% yield.

**<sup>1</sup>H NMR** δ2.18 (3H, s, CH<sub>3</sub>), 3.85 (3H, s, CH<sub>3</sub>OCO), 6.82-6.90 (4H, m, ArH), 6.98-7.02 (2H, m, ArH), 7.18 (3H, m, ArH), 7.94 (1H, d, *J*=1.5 Hz, ArH), 8.25 (1H, d, *J*=1.5 Hz, ArH). **<sup>13</sup>C NMR** (62.9 MHz, CDCl<sub>3</sub>): δ21.1, 52.4, 124.7, 127.4, 127.7, 128.5, 129.4, 130.2, 130.4, 132.5, 133.4, 136.7, 137.2, 139.5, 143.7, 145.5, 165.7. **FTIR**: ν<sub>max</sub>/CHCl<sub>3</sub>, cm<sup>-1</sup> 2360 (w) 1725 (s), 1240 (s). **HRMS** (EI<sup>+</sup>) Calcd for C<sub>21</sub>H<sub>17</sub>BrO<sub>2</sub> 380.0412 Found: 380.0413.

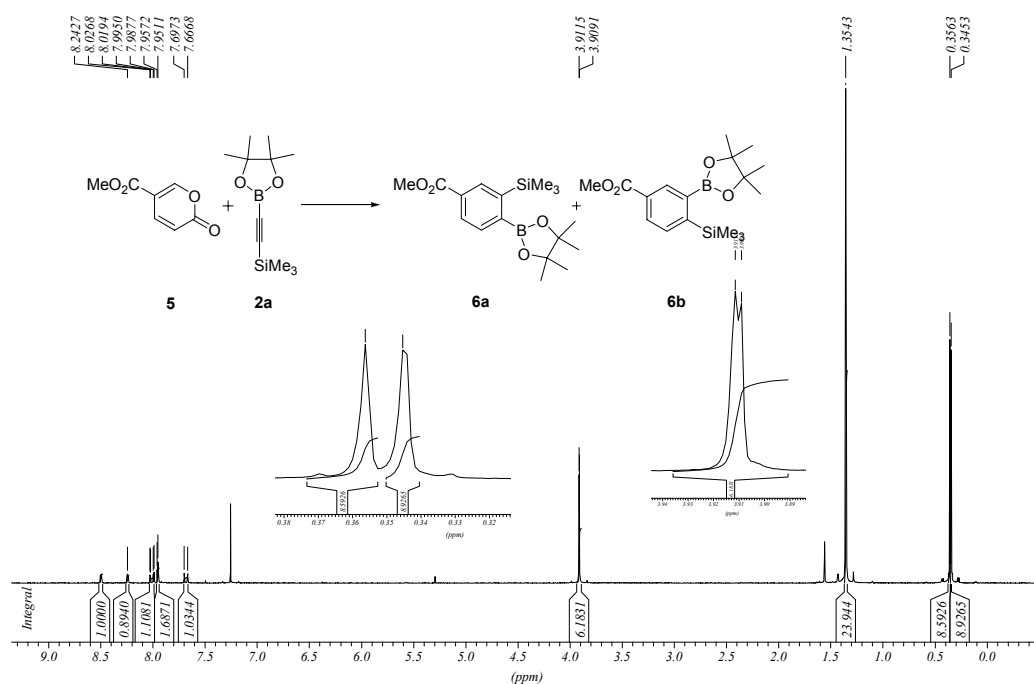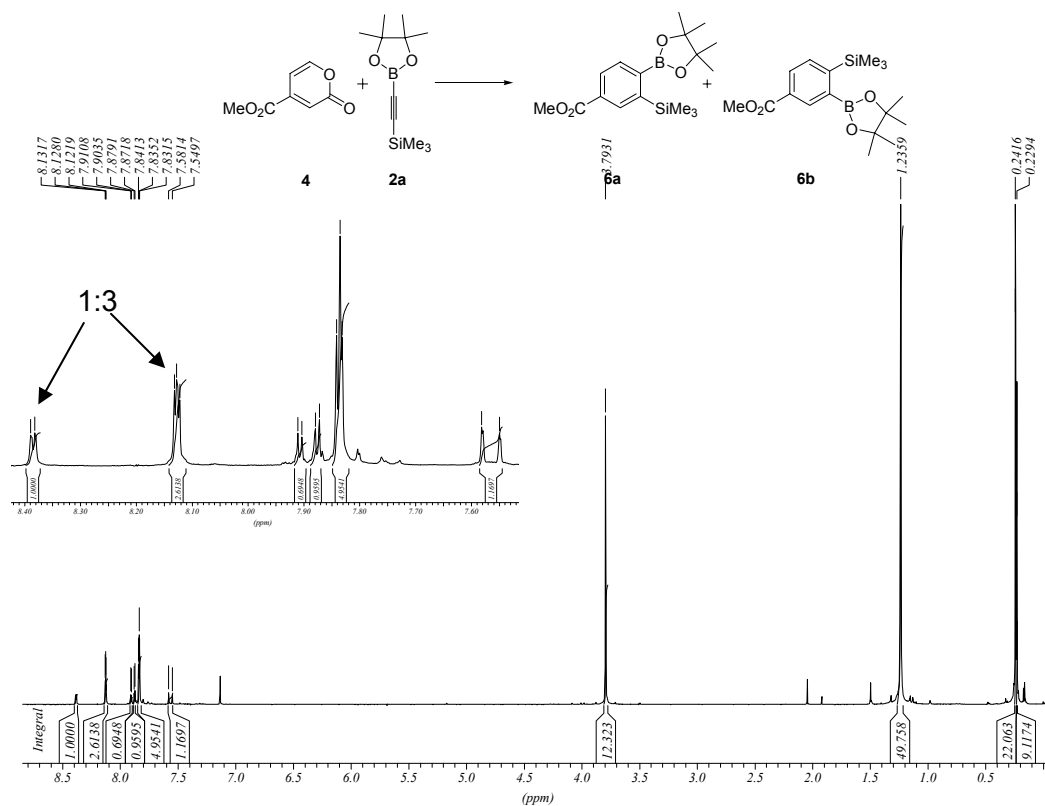

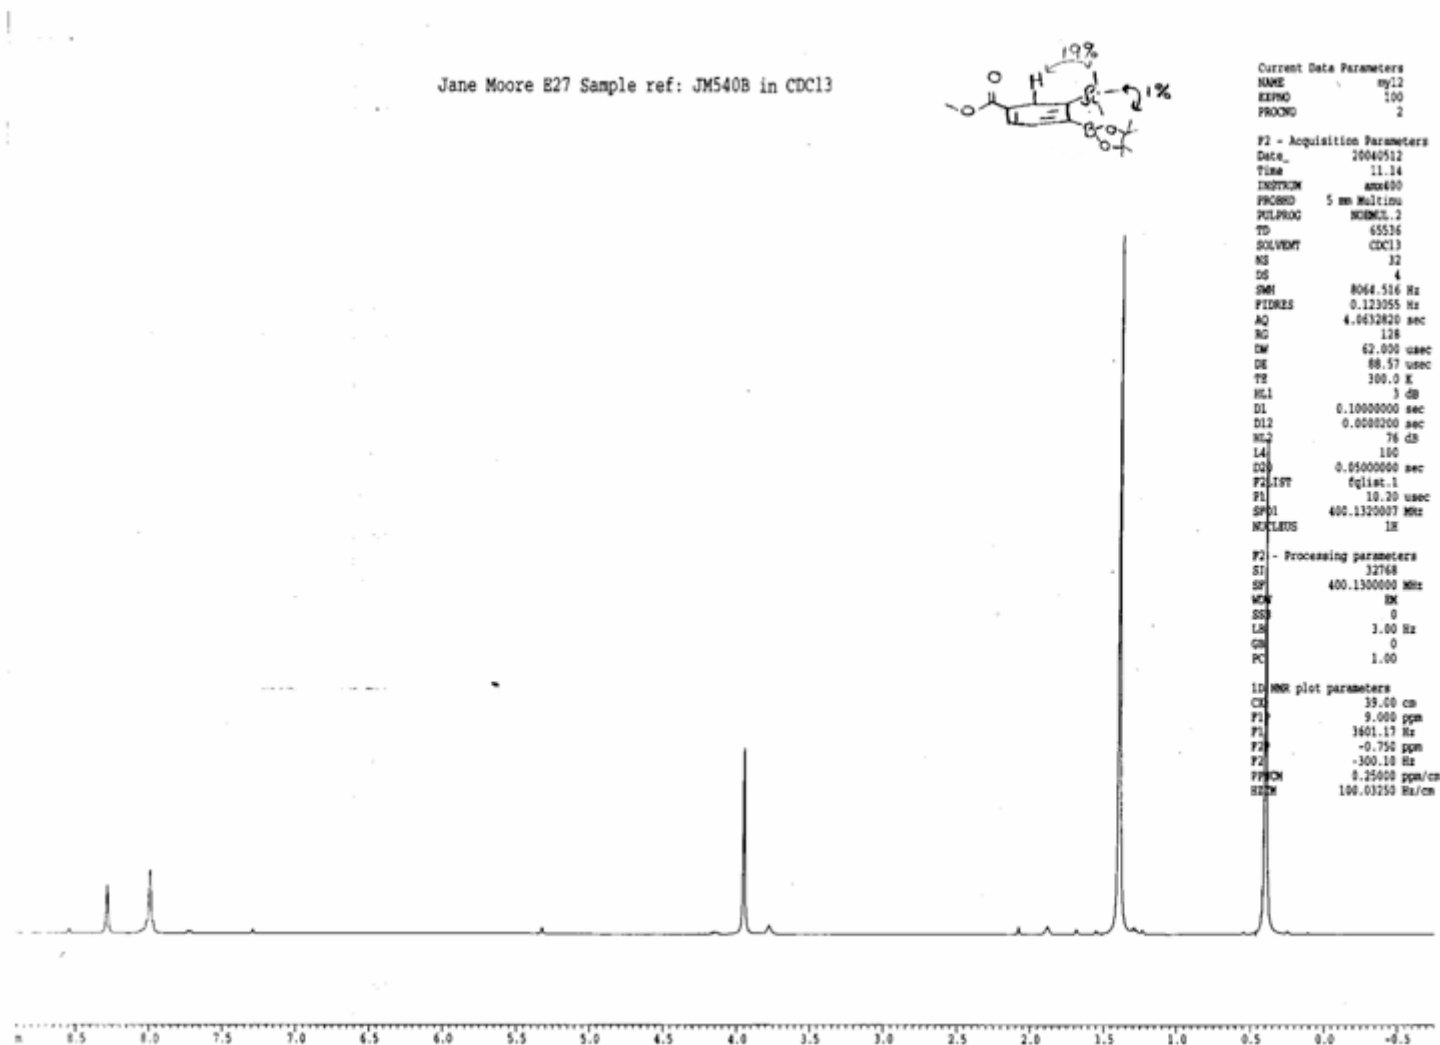

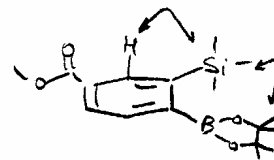

Difference spectra plotted with a Y-gain of 32

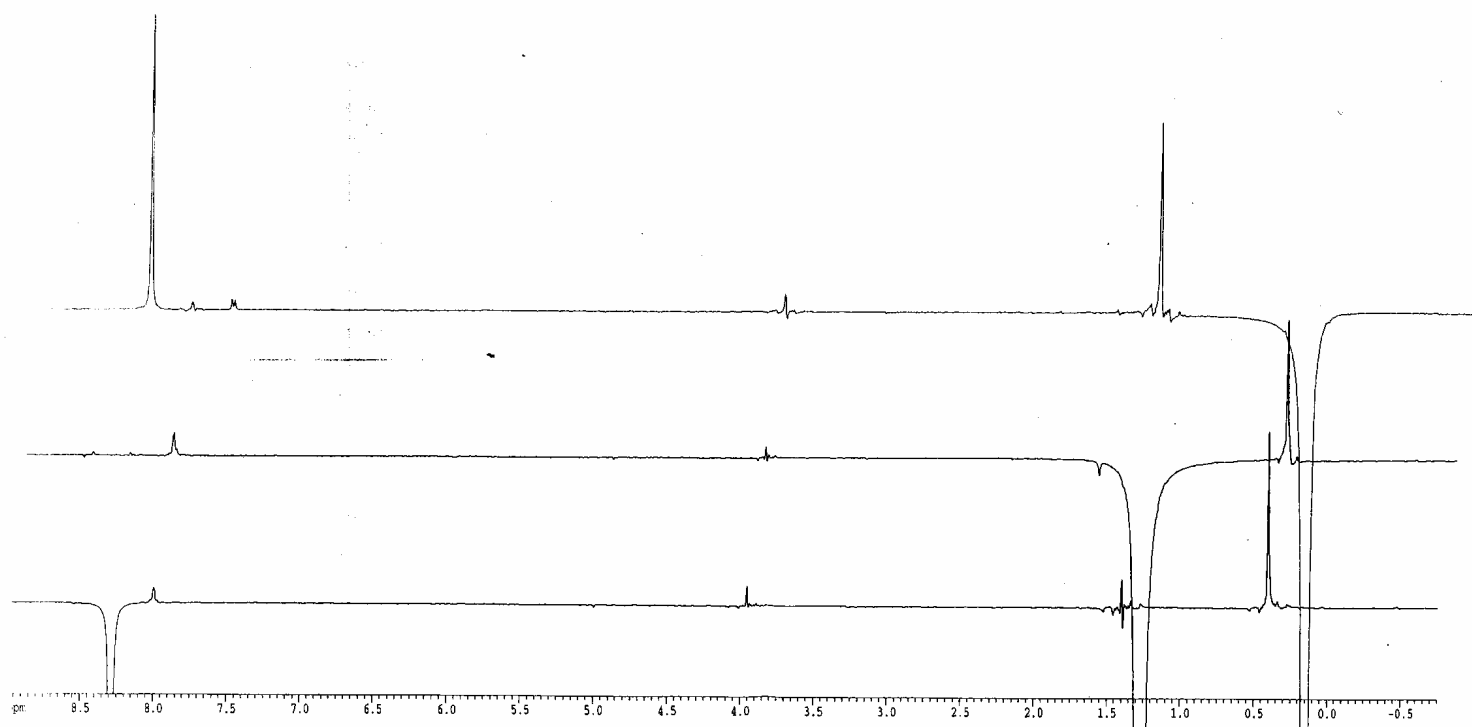

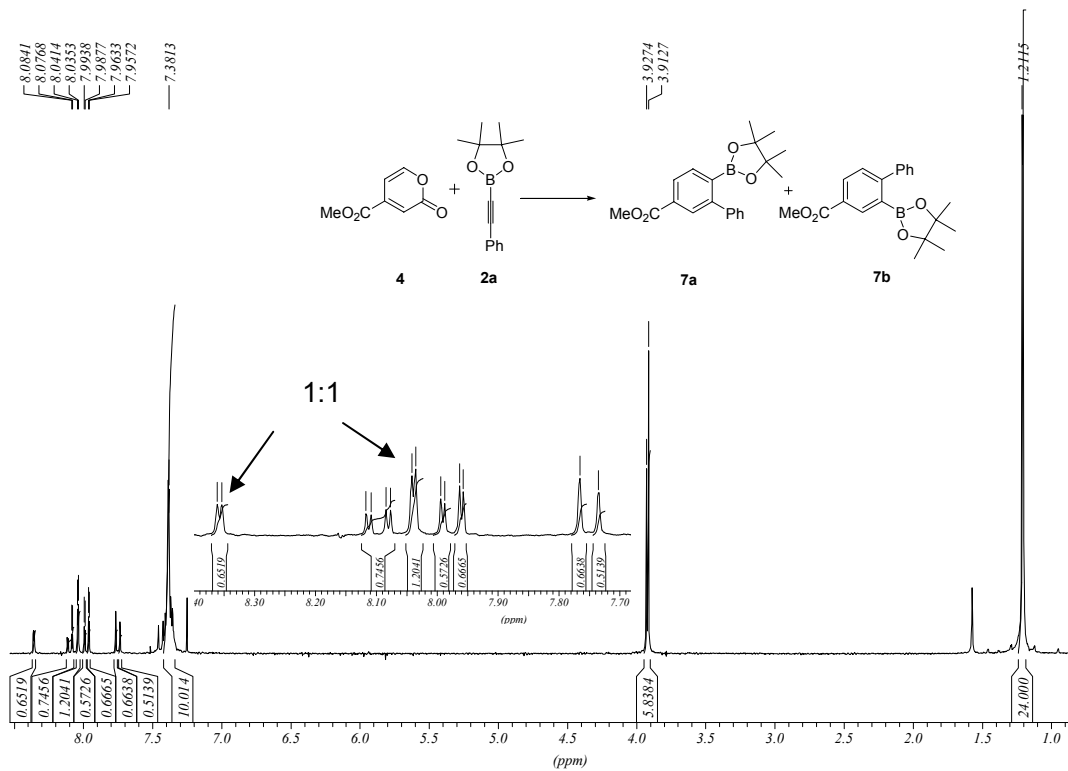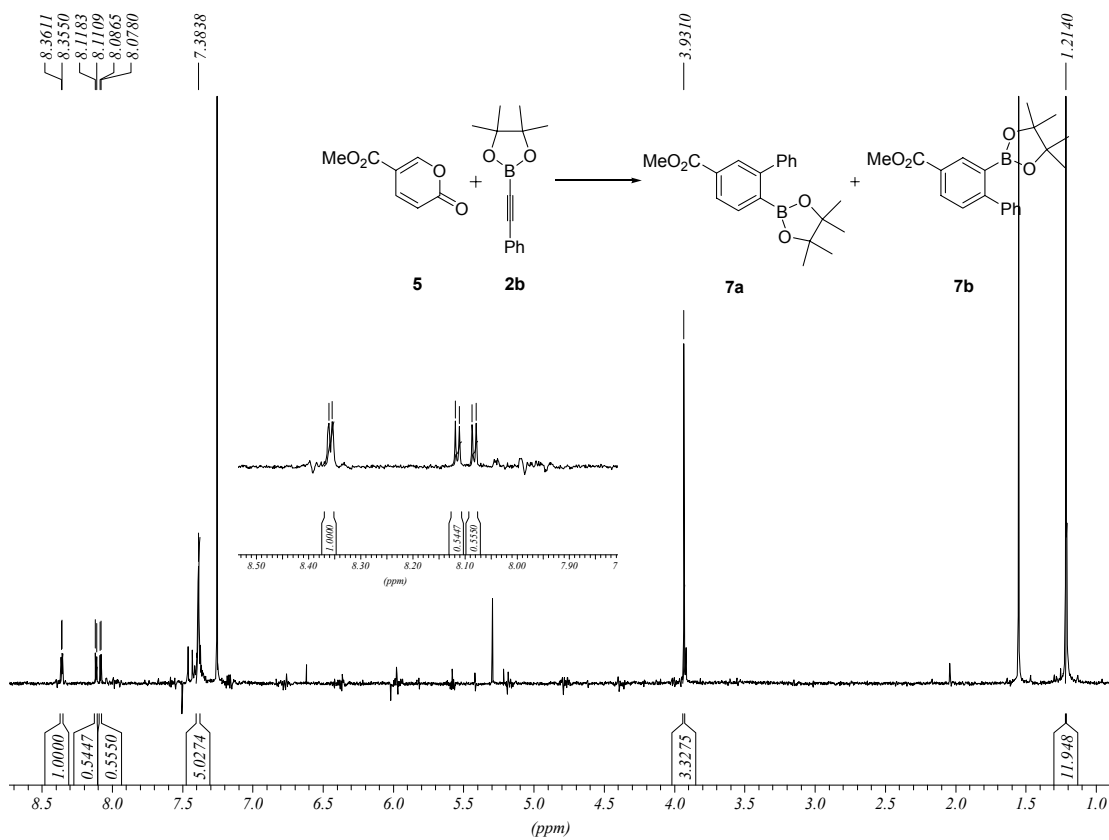

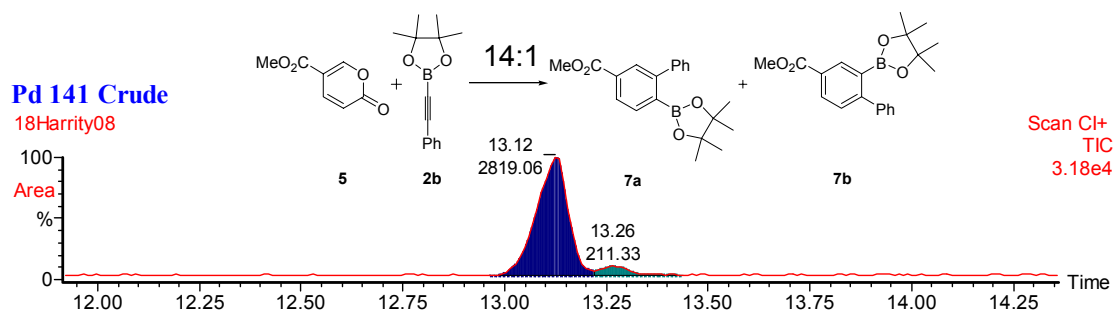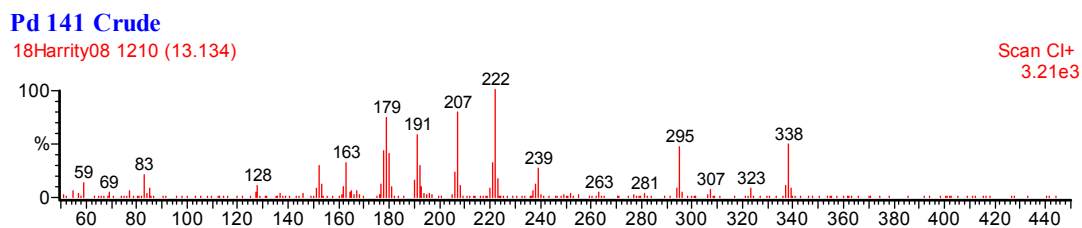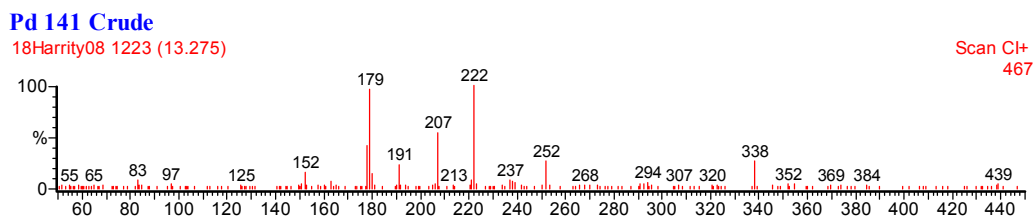

Jane Moore E27 Sample ref: JM 613c in CDCl<sub>3</sub>

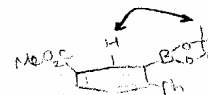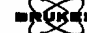

```

Current Data Parameters
NAME          oc29
EXPNO         4
PROCNO        1

F2 - Acquisition Parameters
Date_         20041029
Time          16.14
INSTRUM       dx500
PROBHD        5 mm BBI 1H-5B
PULPROG       zgpg30
TD            256k
SOLVENT       CDCl3
NS            16
DS            4
SWH           5112.475 Hz
FIDRES        2.496325 Hz
AQ            0.2003444 sec
RG            64
DW            97.800 usec
DE            6.00 usec
TE            292.2 K
CO            0.0000000 sec
D1            2.0000000 sec
D2            0.3000001 sec
D3            0.00018560 sec
MCKEAT        0.0000000 sec
MCHEM        1.0000000 sec
STICNT        128

===== CHANNEL f1 =====
NUC1           1H
P1            7.68 usec
PL1           -3.00 dB
SFO1          500.1323022 MHz

F1 - Acquisition parameters
WDW            3
SSB            0
GB            0
PC            1.00

F2 - Processing parameters
SI            1024
SF            500.1300000 MHz
WDW           GAUSS2
SSB            2
GB            0
PC            1.00

F1 - Processing parameters
SI            1024
SF            500.1300000 MHz
WDW           GAUSS2
SSB            2
GB            0
PC            1.00
  
```

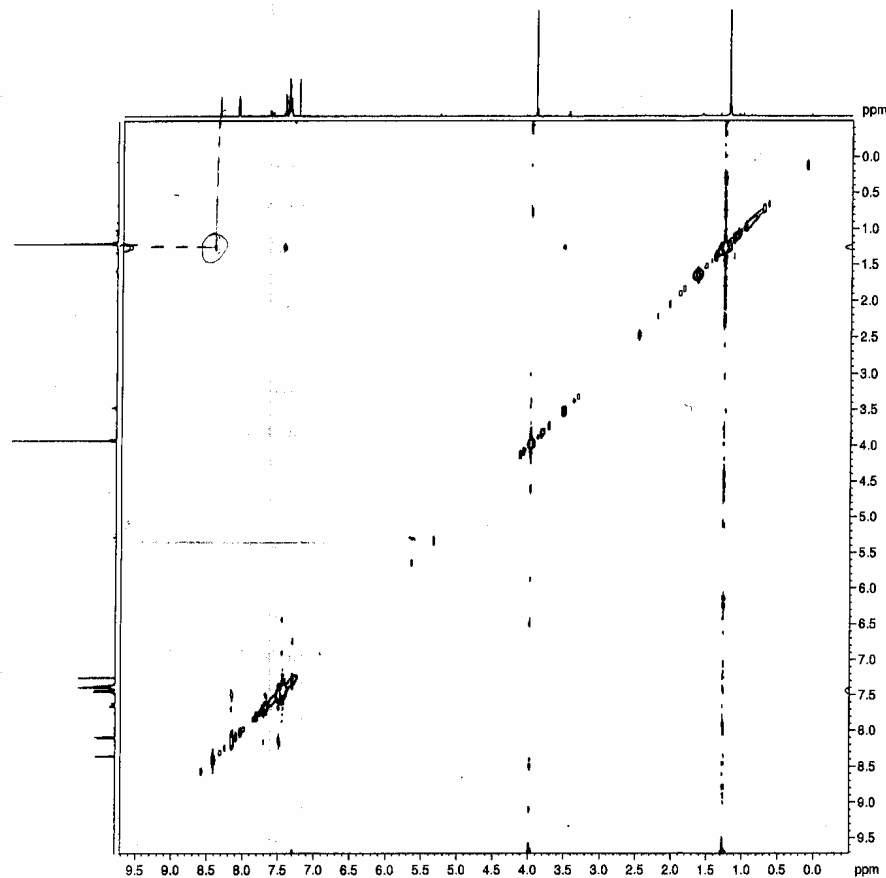

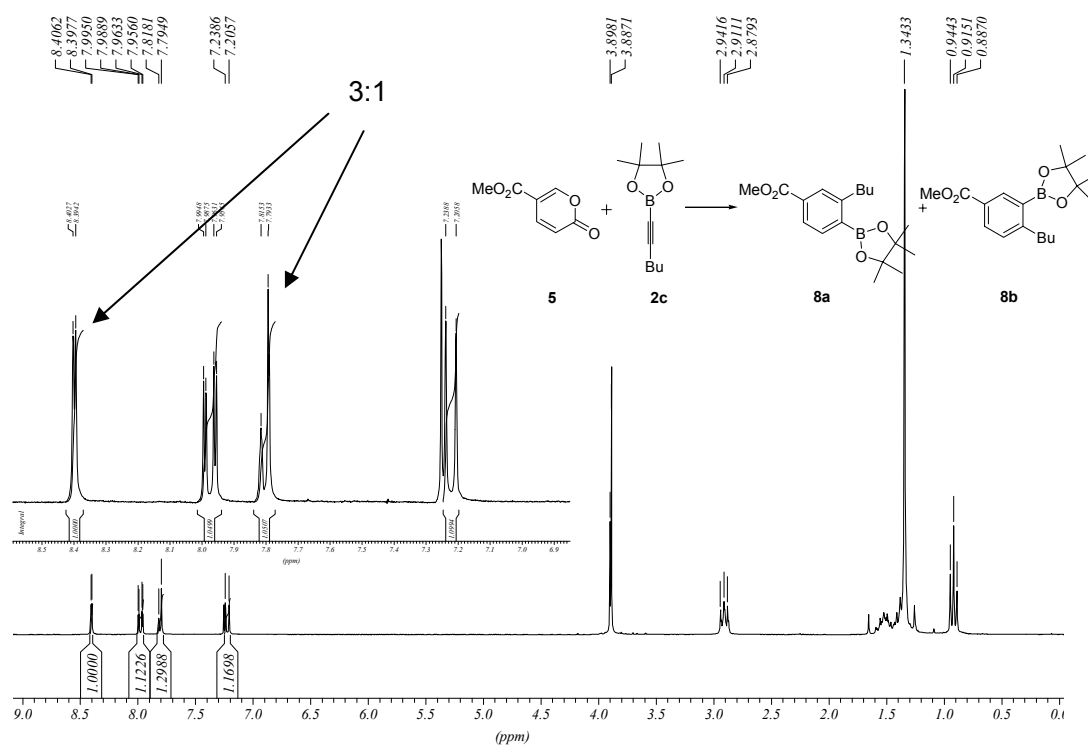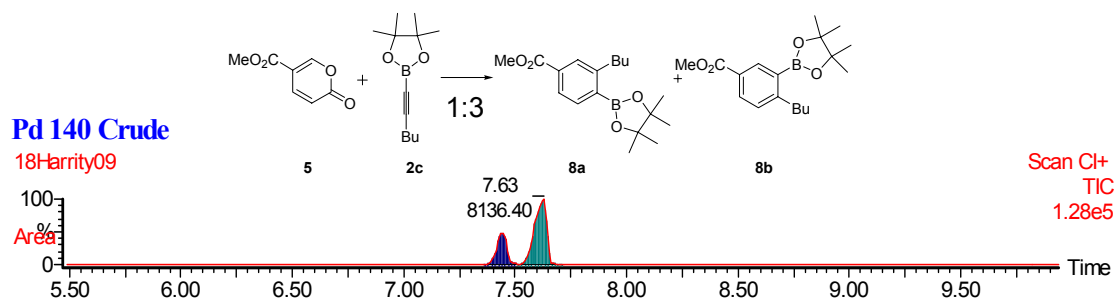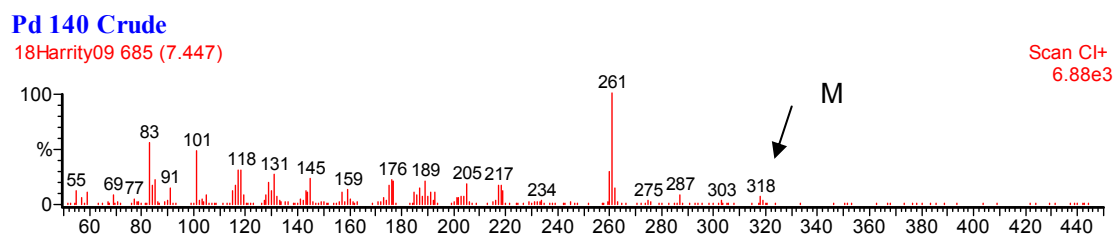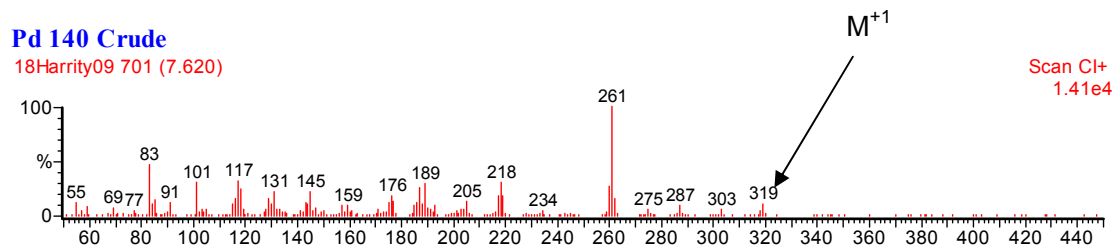

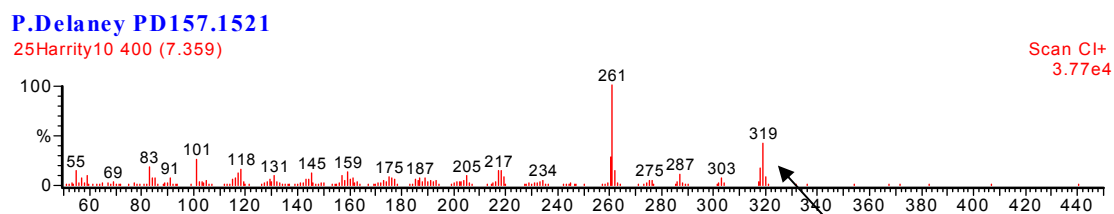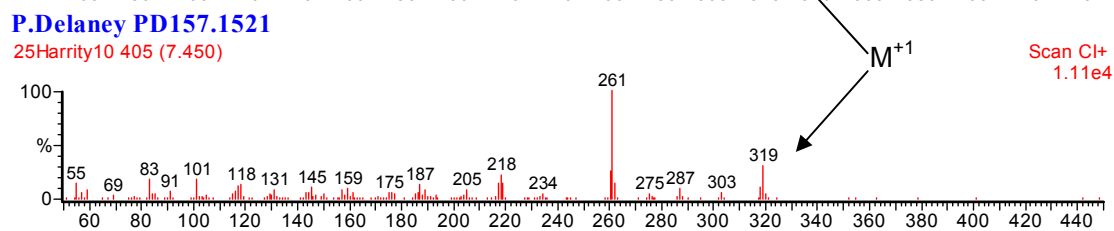

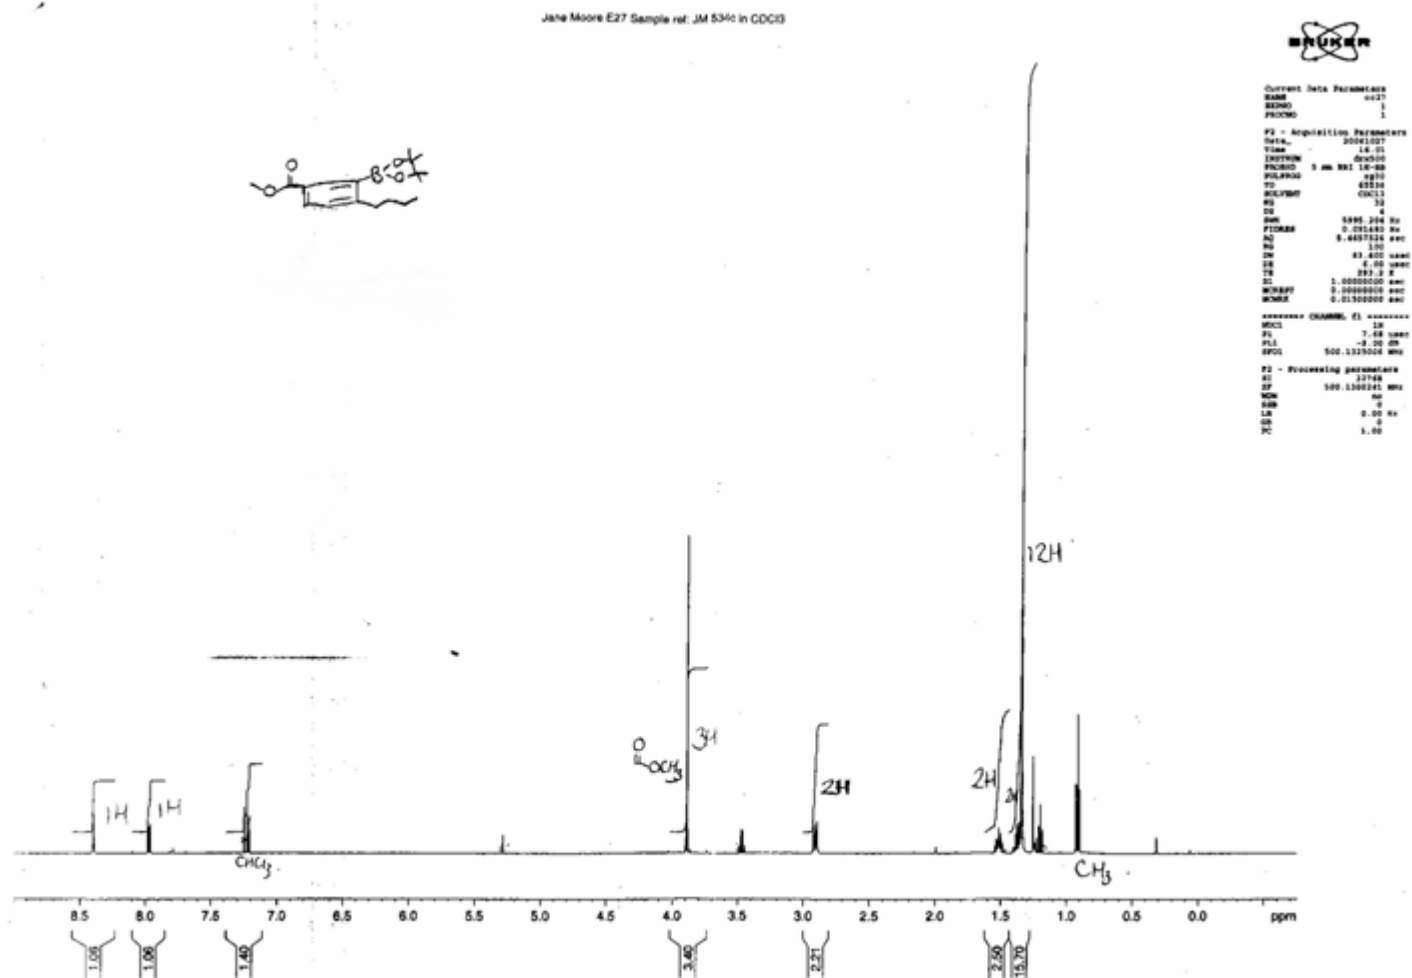

Moore E27 Sample ref: JM 534c in CDC13

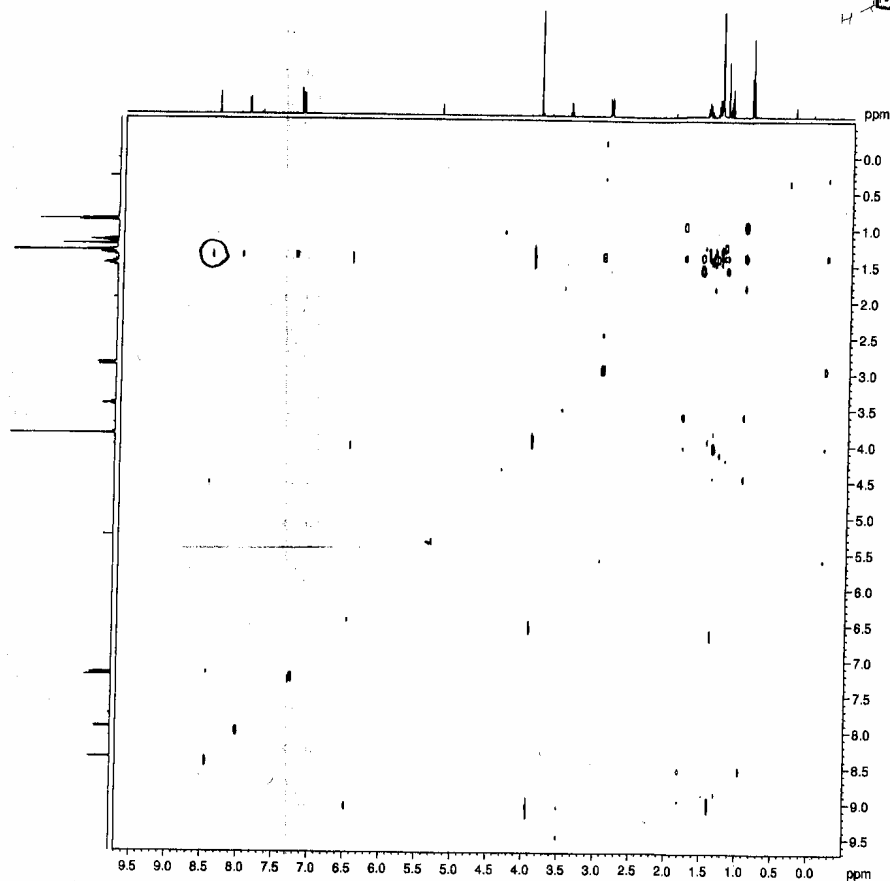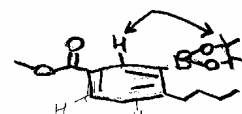

Current Data Parameters  
NAME: 0027  
EXPNO: 1  
PROCNO: 1

F2 - Acquisition Parameters  
Date\_: 20041027  
Time: 14.30  
INSTRUM: drx500  
PROBHD: 5 mm BBI 1H-13  
PULPROG: none  
TD: 2688  
SOLVENT: d2o  
NS: 4  
DS: 4  
SWH: 3112.475 Hz  
FIDRES: 0.496325 Hz  
AQ: 0.2003444 sec  
RG: 1149.4  
DM: 97.800 usec  
DE: 6.00 usec  
TE: 293.1 K  
d0: 0.0000000 sec  
d1: 2.0000000 sec  
d2: 0.0000001 sec  
d3: 0.0000000 sec  
JWD: 0.0019560 sec  
MCKEY: 0.0000000 sec  
MCMRK: 1.0000000 sec  
STICHT: 128

CHANNEL f1  
NUC1: 1H  
P1: 7.68 usec  
PL1: -3.00 dB  
SFO1: 500.132022 MHz

F1 - Acquisition parameters  
ND0: 1  
TD: 2688  
SFO1: 500.1323 MHz  
FIDRES: 19.970004 Hz  
SW: 10.222 ppm  
F0MODE: States-TFPI

F2 - Processing parameters  
SI: 1024  
SF: 500.1300000 MHz  
WDW: Q9312  
SSB: 2  
LB: 0.00 Hz  
GB: 0  
FC: 1.00

F1 - Processing parameters  
SI: 1024  
MC2: States-TFPI  
SF: 500.1300000 MHz  
WDW: Q9312  
SSB: 2  
LB: 0.00 Hz  
GB: 0

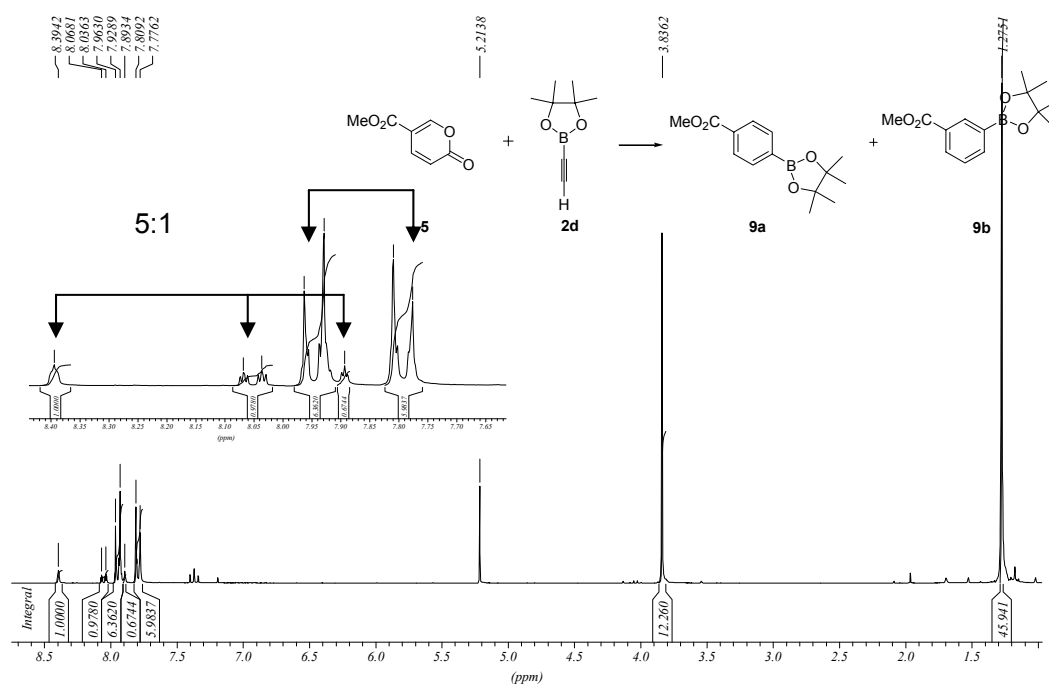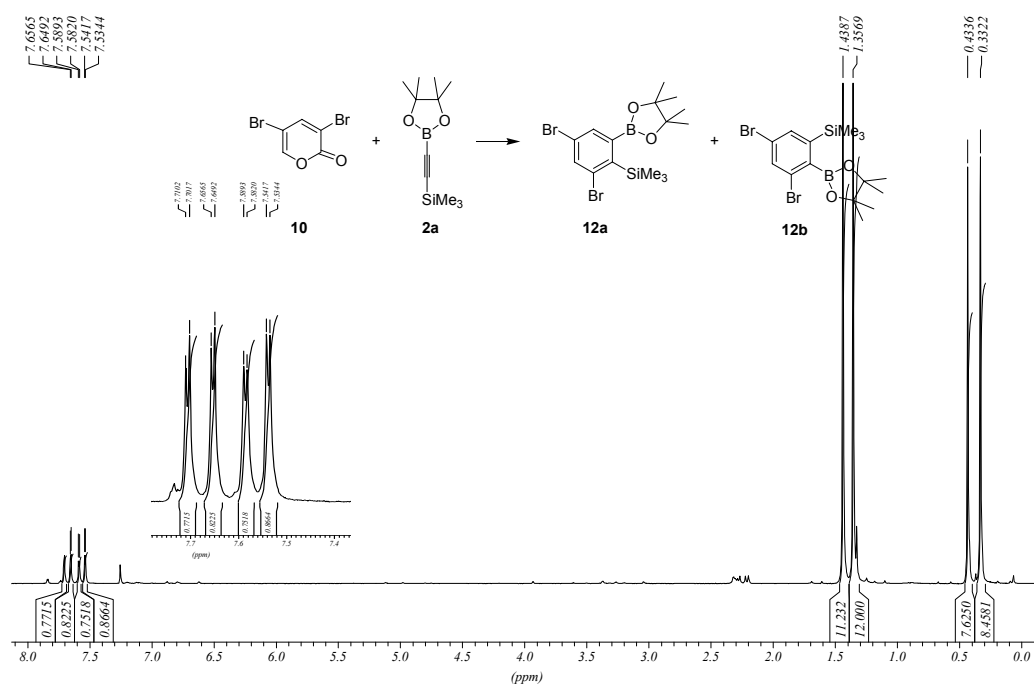

**P. Delaney PD268 dibromobutyl**

46Harrity01

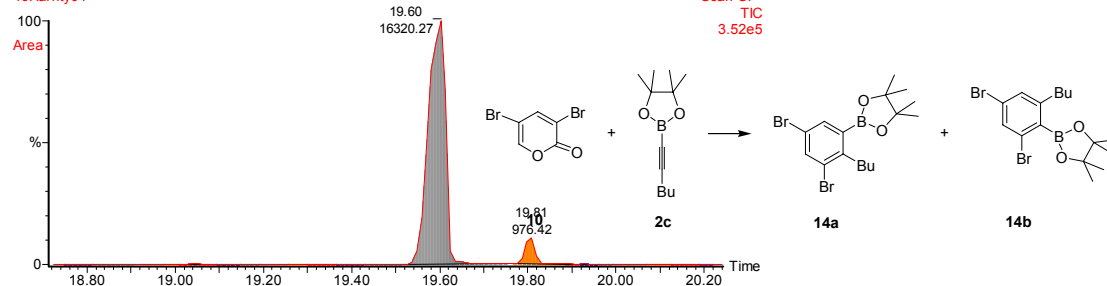

**P. Delaney PD268 dibromobutyl**

46Harrity01 1807 (19.602)

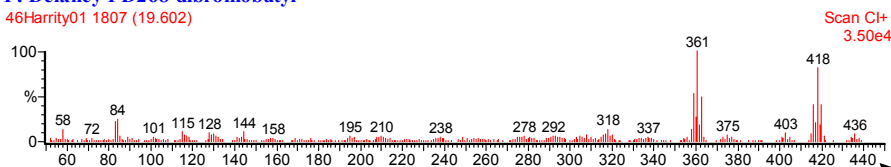

**P. Delaney PD268 dibromobutyl**

46Harrity01 1826 (19.808)

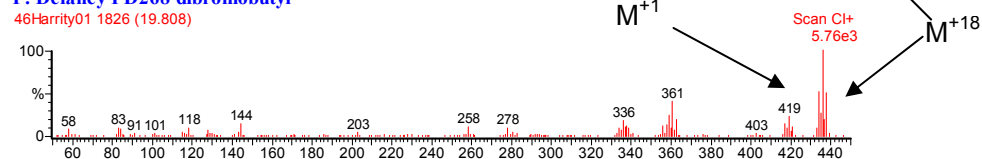

$M^{+18} = \text{mass ion} + \text{NH}_3$

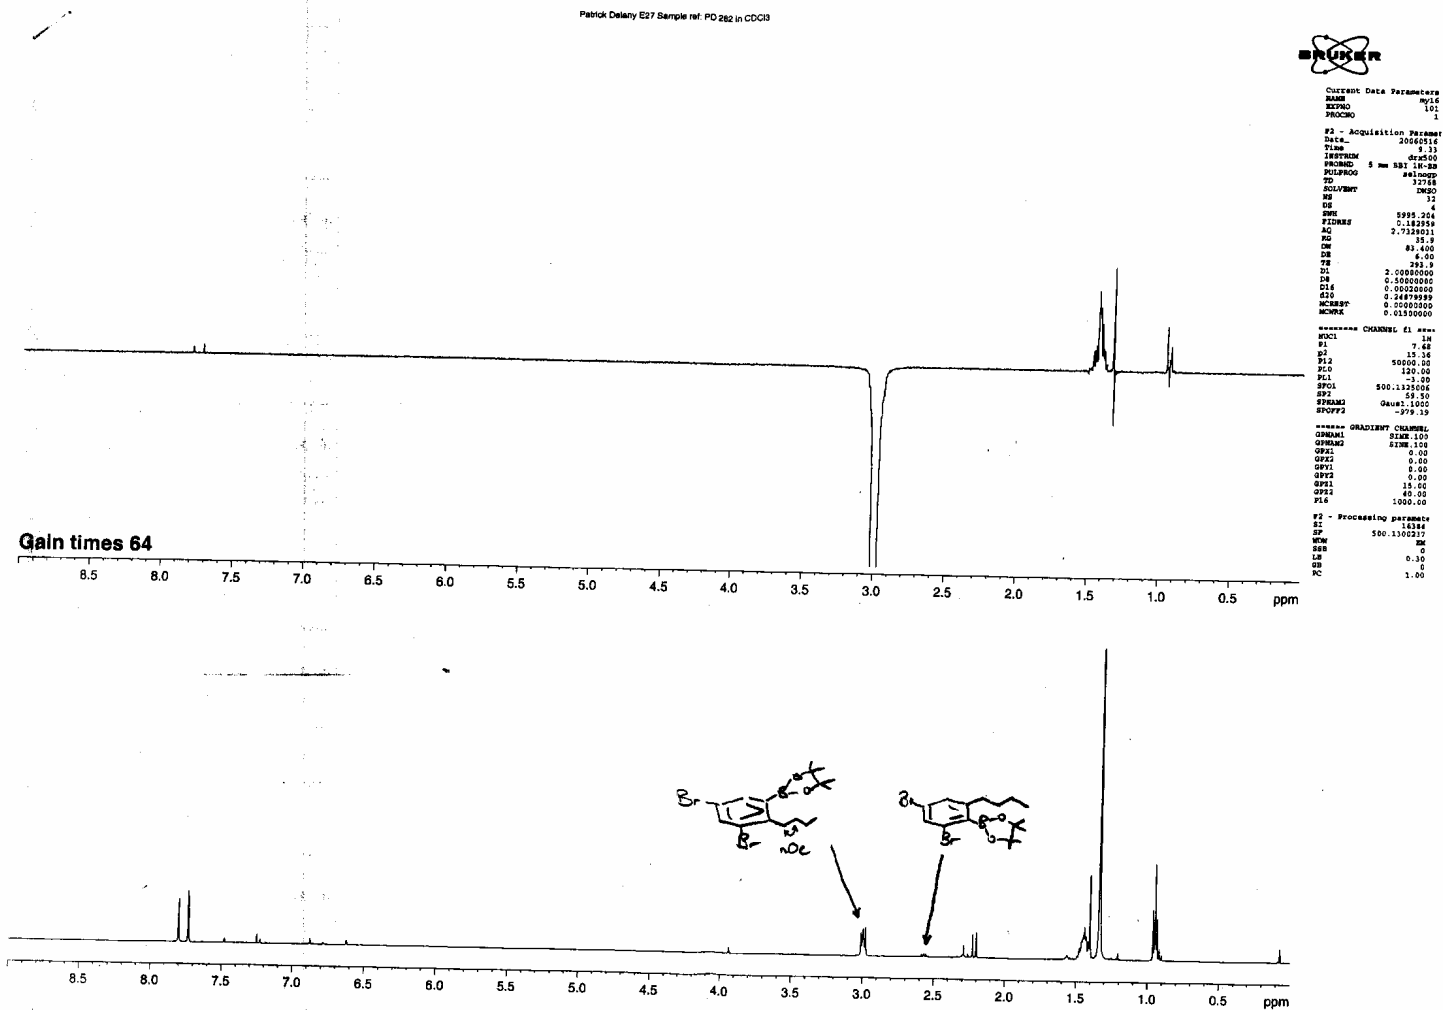

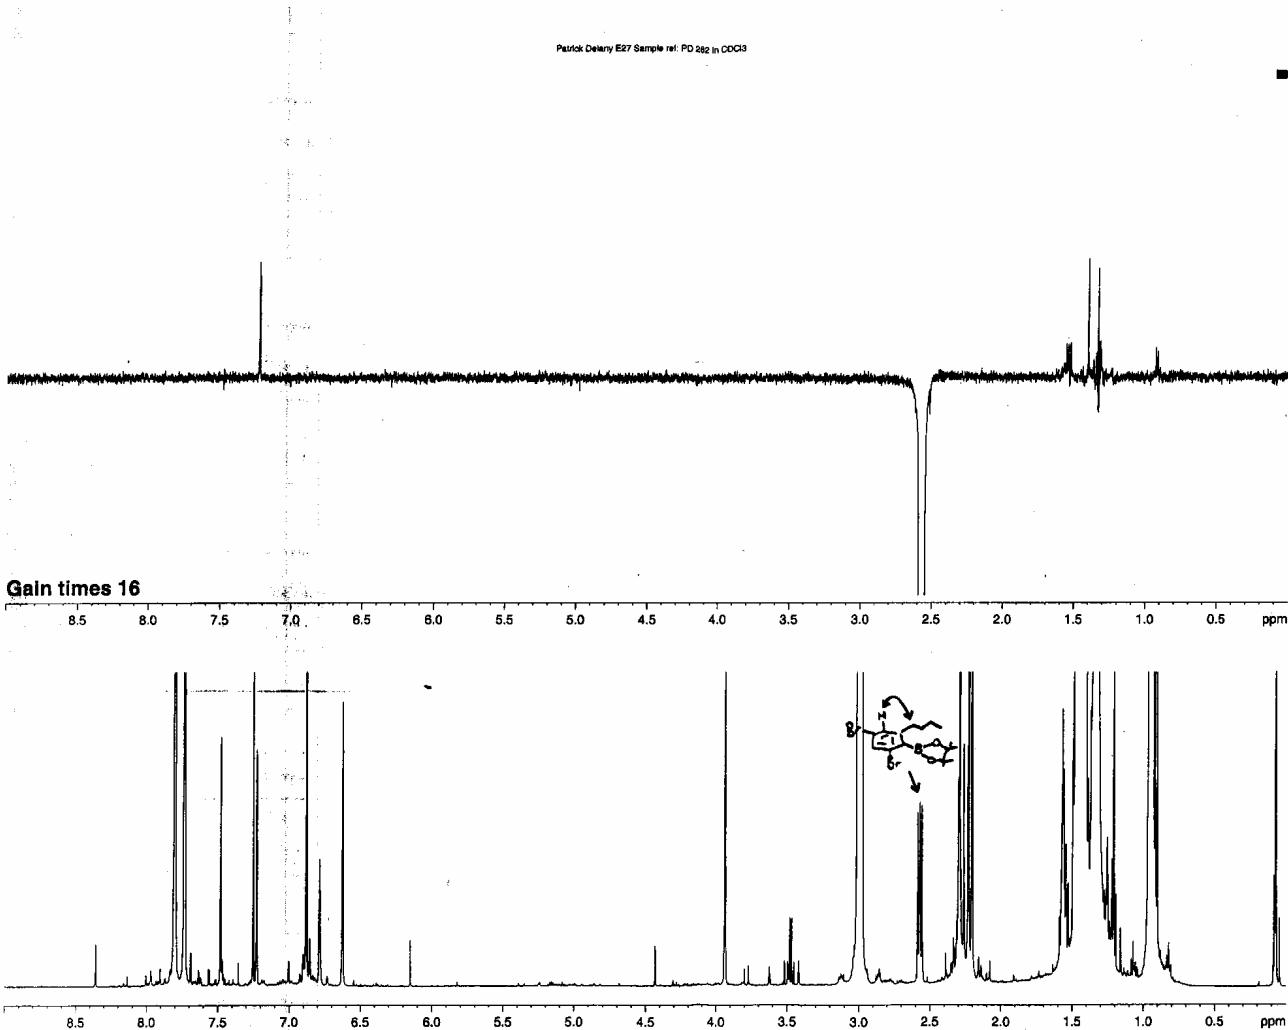

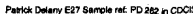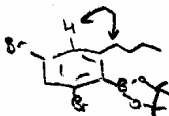

## Gain times 16
